## Structural basis of bile acid receptor activation and Gs coupling

Fan Yang<sup>1, 3#</sup>, Chunyou Mao<sup>2#</sup>, Lulu Guo<sup>1#</sup>, Jingyu Lin<sup>1, 3#</sup>, Qianqian Ming<sup>2, 10#</sup>, Peng Xiao<sup>1#</sup>, Xiang Wu<sup>1#</sup>, Qingya Shen<sup>2</sup>, Shimeng Guo<sup>4</sup>, Dan-Dan Shen<sup>2</sup>, Ruirui Lu<sup>1, 6</sup>, Linqi Zhang<sup>7</sup>, Shenming Huang<sup>7</sup>, Yuqi Ping<sup>1</sup>, Chenlu Zhang<sup>4</sup>, Cheng Ma<sup>2</sup>, Kai Zhang<sup>1</sup>, Xiaoying Liang<sup>4</sup>, Yuemao Shen<sup>8</sup>, Fajun Nan<sup>4</sup>, Fan Yi<sup>9</sup>, Vincent C Luca<sup>10</sup>, Jiuyao Zhou<sup>6</sup>, Changtao Jiang<sup>7</sup>, Jin-Peng Sun<sup>1, 6, 7\*</sup>, Xin Xie<sup>4\*</sup>, Xiao Yu<sup>1, 3\*</sup>, Yan Zhang<sup>2\*</sup>

### Affiliations:

<sup>1</sup>Key Laboratory Experimental Teratology of the Ministry of Education and Department of Biochemistry and Molecular Biology, Shandong University School of Medicine, 44 Wenhua Xi Road, Jinan, Shandong 250012, China.

<sup>2</sup>Department of Pathology of Sir Run Run Shaw Hospital and Department of Biophysics, Zhejiang University School of Medicine, Hangzhou, Zhejiang 310058, China.

<sup>3</sup>Key Laboratory Experimental Teratology of the Ministry of Education and Department of Physiology, Shandong University School of Medicine, 44 Wenhua Xi Road, Jinan, Shandong 250012, China.

<sup>4</sup>CAS Key Laboratory of Receptor Research, the National Center for Drug Screening, Shanghai Institute of Materia Medica, Chinese Academy of Sciences, Shanghai 201203, China.

<sup>5</sup>Department of Biophysics, Zhejiang University School of Medicine, Hangzhou, Zhejiang 310058, China.

<sup>6</sup>Department of Pharmacology, School of Pharmaceutical Sciences, Guangzhou University of Chinese Medicine, 232 WaiHuan East Road, Guangzhou University Town, Guangzhou 510006, PR China.

<sup>7</sup>Department of Physiology and Pathophysiology, School of Basic Medical Sciences, Peking University, Key Laboratory of Molecular Cardiovascular Science, Ministry of Education, Beijing 100191, China.

<sup>8</sup>School of Pharmaceutical Sciences, Shandong University, Jinan, Shandong 250012, China.

<sup>9</sup>The Key Laboratory of Infection and Immunity of Shandong Province, Department of Pharmacology, Shandong University School of Medicine, Jinan 250012, China.

<sup>10</sup>Department of Drug Discovery, Moffitt Cancer Center and Research Institute, Tampa, FL 33612, USA.

# These authors contributed equally to this work.

\* Corresponding author: Jin-Peng Sun (corresponding author)

E-mail: sunjinpeng@sdu.edu.cn

Xin Xie (corresponding author)

E-mail: xxie@simm.ac.cn

Yan Zhang (corresponding author)

E-mail: zhang\_yan@zju.edu.cn

Xiao Yu (corresponding author)

E-mail: yuxiao@sdu.edu.cn

### Abstract

**G protein-coupled bile acid receptor (GPBAR) is a membrane receptor that senses bile acids to regulate diverse functions through Gs activation. Here, we report the cryo-EM structures of GPBAR–Gs complexes stabilized by either high-affinity P395 or the semisynthesized bile acid derivative INT-777 at 3-Å resolution. These structures revealed a large oval-shaped ligand pocket with several sporadic polar groups to accommodate the**

44 **amphipathic cholic core of bile acids. A fingerprint of key residues recognizing diverse**  
45 **bile acids in the orthosteric site, a putative second bile acid binding site with allosteric**  
46 **properties and structural features contributing to bias property were identified through**  
47 **structural analysis and mutagenesis studies. Moreover, structural comparison of GPBAR**  
48 **with other GPCRs uncovered an atypical mode of receptor activation and G-protein-**  
49 **coupling, featuring a different set of key residues connecting the ligand binding pocket to**  
50 **the Gs coupling site, and a specific interaction motif localized in intracellular loop 3.**  
51 **Overall, our study not only provides unique structural features of GPBAR in bile acid**  
52 **recognition, allosteric effects and biased signaling, but also suggests that distinct allosteric**  
53 **connecting mechanisms between the ligand binding pocket and the G protein binding site**  
54 **exist in the GPCR superfamily.**

55

## 56 **Introduction**

57

58 Bile acids are important endocrine and amphipathic signaling molecules that are  
59 synthesized from cholesterol in the liver and further diversified by the gut microbiota<sup>1,2</sup>. Their  
60 diverse biological effects on mediating insulin resistance, obesity, lipid metabolism, and  
61 systemic metabolic control are exerted in conjunction with the nuclear farnesoid X receptor  
62 (FXR) and the membrane-bound G protein-coupled bile acid receptor GPBAR (TGR5 or  
63 GPR131)<sup>3</sup>. GPBAR has been found in a wide range of tissues and serves as a signaling hub in  
64 the liver–bile-acid–microbiota–metabolism axis<sup>1,3,4</sup>.

65 Bile acids induce both beneficial and adverse effects in different pathophysiological  
66 conditions via GPBAR. For example, cholic acid (CA) and taurocholic acid (TCA) increase  
67 energy expenditure and reduce adiposity through activation of GPBAR<sup>5,6</sup>.  
68 Tauroursodeoxycholic acid (TUDCA) has been used in traditional Chinese medicine for more  
69 than 3000 years and shows anti-inflammatory effects in the liver and promotes nitric oxide (NO)  
70 release and vasodilation in the heart<sup>1,7</sup>. Conversely, lithocholic acid (LCA) has been reported to  
71 cause insulin resistance, and deoxycholic acid (DCA) has been shown to promote cancer cell  
72 progression. Apart from the differences in distribution and metabolism among bile acids, the  
73 diverse downstream pathways of GPBAR also contribute to various functional outcomes. Many  
74 of the beneficial effects of bile acids, such as protecting against obesity and diabetes, combating  
75 steatosis and reducing inflammation<sup>8-12</sup>, have been attributed to GPBAR–Gs coupling. In  
76 addition, GPBAR signals to  $\beta$ -arrestin to activate SRC kinase and induce innate antiviral  
77 immune response in divergent cell types<sup>13,14</sup>. Notably, sequence alignment of GPBAR with  
78 other family A GPCRs whose structures are available implies that it lacks the conserved NPxxY  
79 motif and has a shortening at intracellular loop 2 (ICL2), indicating a potential different  
80 activation mechanism (Extended Data Fig. 1)<sup>15,16</sup>. Due to the paucity of knowledge about the

81 detection of amphipathic ligands by membrane receptors, the diversity in function and  
82 signalling after the engagement of GPBAR with different bile acids, the lack of several  
83 conserved motifs required for GPCR activations, there is an urgent need to delineate the  
84 molecular mechanism underlying GPBAR activation in response to various bile acids. Here,  
85 we determined 3-Å cryo-EM structures of the GPBAR–Gs in complexes with P395 and INT-  
86 777, a highly potent synthetic agonist and a semisynthesized bile acid derivative with beneficial  
87 effects in nonalcoholic steatohepatitis (NASH) in preclinical animal studies, respectively.  
88 These structures, provide key knowledge for an unconventional activation mechanism of  
89 GPBAR in response to agonists, a detailed fingerprint for the recognition of diverse bile acids,  
90 the structural basis for biased GPBAR signalling, an alternative GPCR–Gs–protein engagement  
91 mode and a potential second bile acid binding site with allosteric properties.

92

## 93 **Results:**

94

### 95 **Complex formation and cryo-EM analysis**

96 Full-length human GPBAR with thermostabilized cytochrome b<sub>562</sub>RIL (BRIL) introduced  
97 into the N-terminus was co-expressed with Gs protein in *Spodoptera frugiperda* (Sf9) insect  
98 cells. Active complexes were readily formed by the addition of excess high-affinity agonist  
99 P395<sup>17</sup> and the nanobody Nb35<sup>16</sup> (Extended Data Fig. 2a), however, the low solubility and  
100 affinity of endogenous bile acids complicate the formation of bile acid–GPBAR–Gs complexes  
101 *in vitro*. We screened a panel of bile acids and identified that only INT-777 robustly promoted  
102 a high fraction of GPBAR–Gs complex formation (Extended Data Fig.2b,). The GPBAR–Gs  
103 complexes stabilized by P395 or INT-777 were purified and analysed by single-particle Cryo-  
104 EM, which enabled us to construct electron density maps with an overall resolution of 3.0-Å  
105 (Extended Data Fig. 2c-2f, Extended table 1). Atomic resolution structures of GPBAR  
106 including all seven transmembrane (TM) helices with both intracellular and extracellular loops  
107 (ICLs and ECLs, respectively) were confidently modelled using the high-resolution electron  
108 density, and the majority of the side chains from the receptor and the G proteins were clearly  
109 identified (Fig. 1a-1b and Extended Data Fig. 3). In particular, a well-defined density was  
110 observed for ICL3, which is not well resolved in any of the available GPCR–Gs structures (Fig.  
111 1a-1b and Extended Data Fig. 3c, 3d). In the receptor orthosteric binding pocket, well-defined  
112 electron densities were unambiguously assigned to the compound P395 or the bile acid  
113 derivative INT-777 (Extended Data Fig. 3c, 3d)

114 Although significant differences were observed in the ligand binding mode, extracellular  
115 motifs and a putative second bile acid binding pocket, the overall architecture of the INT-777–  
116 GPBAR–Gs complex is very similar to that of the P395–GPBAR–Gs complex. Three distinct  
117 yet intercorrelated features were observed for GPBAR–Gs complexes when comparing active

118 GPBAR with those of other class A receptor–Gs complexes, including (1) TM6 had an overall  
119 larger separation from the central TM3 (Fig. 1c-1d), (2) the C-terminal end of the  $\alpha 5$  helix did  
120 not penetrate so deeply into the receptor 7-TM core as other Gs-coupled structures, and (3)  
121 ICL3 was specifically coupled to the Gs protein.

### 122 **Binding of P395 and INT-777 in the orthosteric site**

123 GPBAR expands a large ovate pocket to accommodate the bulky P395 ligand or bile acids.  
124 Inside the orthosteric pocket, a long-stranded hydrophobic strip from TM2 and TM3 holds  
125 the tetrahydropyrido[4,3-d] pyrimidine moiety, whereas another hydrophobic patch from  
126 TM5 accommodates the 4-isopropylphenyl part of P395 (Fig. 1e and Extended Data Fig.  
127 4a,4b). The restraint of these sidewalls forces the folding of P395 into a U-shaped  
128 configuration rather than an extended topology, as predicted by previous studies<sup>18</sup> (Fig. 1e  
129 and Extended Data Fig. 4b). In contrast to P395, INT-777 assumes a shovel-like structural  
130 conformation with folding between ring A and the rest of the steroid core (Fig. 1f and Extended  
131 Data Fig. 4c, 4d). The cyclopentano-bicyclohexyl part (ring B-C-D) is inserted into the ligand  
132 binding pocket of GPBAR in a direction parallel to TM2 (Fig. 1f and Extended Data Fig. 4d,  
133 4e). Interestingly, there is a 90-degree difference between the face of the INT-777 steroid  
134 nucleus core and the face of P395, indicating that ligands with distinct chemical features could  
135 be accommodated by the ligand binding pocket of GPBAR (Extended Data Fig. 4f).

136 Seven hydrophobic residues and three polar residues inside the GPBAR orthosteric site  
137 form common interactions with both P395 and INT-777 (Fig. 1e-1f, Extended Data Fig. 5a and  
138 Extended Table 2, 3). Mutation of these hydrophobic residues to alanine significantly impaired  
139 both P395 and INT-777 interactions (Extended Data Fig. 5b, 5c). Unlike the hydrophobic nature  
140 of P395, one unique characteristic of INT-777 and other bile acids is amphipathic, with all  
141 hydroxyl substituents and a C-terminal carboxyl group pointing to one side, leaving a convex  
142 hydrophobic surface on the other side (Fig. 1f). The convex surface of the INT-777 hydrophobic  
143 side faces toward TM5, ECL2 and ECL3, forming extensive interactions between the rings B,  
144 C and D and the aromatic residues. On the hydrophilic side of INT-777, the hydroxyl groups of  
145 Y240<sup>6,51</sup>, S247<sup>6,58</sup>, and S270<sup>7,43</sup>, as well as the backbone carboxyl of T243<sup>6,54</sup>, L244<sup>6,55</sup> and  
146 S247<sup>6,58</sup>, provide a sporadic polar environment (superscripts referring to Ballesteros-Weinstein  
147 number<sup>19</sup>, Fig. 1f).

148 At the bottom of the orthosteric site, both the shovel structure of INT-777 and the U-shaped  
149 configuration of P395 facilitated the seating of the shovel head or the acyl linker, respectively,  
150 into a hydrophobic pocket cleft, with the strong hydrophobic packing interaction with F96<sup>3,36</sup>  
151 (Extended Data Fig. 5e, 5f). The 3-OH substituent of the steroid nucleus core of INT-777 and  
152 the oxygen of the acyl linker of P395 engage in hydrogen bonding (H-bonding) with the  
153 hydroxyl group of Y240<sup>6,51</sup> (Fig. 1e-1f and Extended Data Fig. 5e, 5f). Both the Y240F and  
154 S247A mutants displayed significantly increased constitutive activity but only very weak

155 induced activation in response to either INT-777 or P395 engagement (Extended Data Fig. 5g,  
156 5h), indicating that the intramolecular polar network involving S247<sup>6,58</sup> and Y240<sup>6,51</sup> may be  
157 required to maintain GPBAR in an inactive state.

### 158 **Structural fingerprints of GPBAR recognizing bile acid**

159 Endogenous bile acids have the same core but are differentiated mainly by hydroxylation  
160 at the 7 (R1) and 12 (R2) positions of the 23-carbon steroid nucleus or by amidation at the  
161 carboxyl terminus (R3) (Fig. 2a). All tested bile acids activate GPBAR but with different  
162 potencies and efficacies for inducing cAMP accumulation<sup>1</sup>, indicating that these compounds  
163 have different abilities for inducing Gs coupling with GPBAR, most likely due to the distinct  
164 receptor conformations stabilized by the corresponding bile acids. These GPBAR  
165 conformational differences may not only affect Gs signalling but also contribute to the  
166 functional diversity of bile acids through arrestin or other downstream effector proteins.  
167 Therefore, generalizing the principle underlying the interaction between various bile acids and  
168 GPBAR is crucial for the selective usage of bile acid derivatives to treat human diseases.

169 The structure of the INT-777–GPBAR complex provided a starting model for investigating  
170 the interaction mode of other bile acids within GPBAR. Ligand binding and mutagenesis  
171 scanning identified 13 residues of GPBAR that are common interaction residues for both INT-  
172 777 and CA, a primary native bile acid (Fig. 2b and Extended Figure 5d). Mutations of L166  
173 and E169 only affected INT-777, likely due to the ethyl group at the 6 position of INT-777 (Fig.  
174 2b and Extended Figure 5d). These results suggest that CA shares a very similar binding mode  
175 of INT-777 and that the INT-777-GPBAR complex is a useful model for studying interactions  
176 between GPBAR and bile acids. We next investigated the specific residues responsible for  
177 recognizing the hydroxyl groups attached to the R1 or R2 positions and the conjugating groups  
178 at its carboxyl terminus, which are mostly diversified in different bile acid structures and could  
179 be determinants of their various biological activities (Fig. 2a). The R1 position (R)-OH forms  
180 a hydrogen bond with S247<sup>6,58</sup> and a hydrophobic interaction with L244<sup>6,55</sup>. The hydroxyl group  
181 at the R2 position participates in hydrophobic interactions with L266<sup>7,39</sup>. Finally, the carboxyl  
182 tail of INT-777 forms specific contact with L263 (Fig. 2a).

183 Due to the weak binding of several bile acids, which poses a great challenge for binding  
184 assays, we used the cAMP assay to functionally examine the mutagenesis effects of these  
185 potential key bile acid interacting residues toward all 9 commercially available bile acids (Fig.  
186 2c-2e; Extended Data Fig 6). Specifically, the L244A mutation significantly decreased the half-  
187 maximal effective concentration (EC50) of INT-777, CA, CDCA, GCA and TCA, which all  
188 have a hydroxyl group at the R1 position. In contrast, the effect of L244A on other tested bile  
189 acids, including LCA, DCA, UDCA, TDCA and TUDCA, showed no significant effect (Fig.  
190 2c). The mutating effects of L266A also paired well with the bile acids that had a hydroxyl  
191 group at the R2 position (Fig. 2d). Intriguingly, the L263A mutation moderately decreased the

192 Gs activity of GPBAR in response to the engagement of bile acids that had a hydroxyl group at  
193 the R3 position, such as LCA, DCA and UDCA, but it had much larger effects on the EC<sub>50</sub> of  
194 cAMP accumulation elicited by GCA, TCA, TDCA and TUDCA, all of which had larger groups  
195 conjugated at the R3 position at the end of the steroid core (Fig. 2e, Extended Data Fig. 6). In  
196 summary, the combination of the mutating effects and the INT-777–GPBAR complex structure  
197 revealed that triplet leucine cluster (L244<sup>6.55</sup>, L263<sup>7.36</sup> and L266<sup>7.39</sup>), as well as a potential role  
198 of S247<sup>6.58</sup>, constitute a fingerprint reader to discriminate the interactions between different bile  
199 acids and GPBAR (Fig. 2a).

## 200 **An unconventional activation mechanism**

201 A unique characteristic of the activated GPBAR is located in the TM5-ICL3-TM6 region,  
202 featuring the more contracted intercellular rim of TM6 and the overall loose contact between  
203 TM3 and TM6 in the middle of the TM region compared with those of other activated class A  
204 GPCRs (Fig. 1b, 1c and 3a)<sup>15,20,21</sup>. The intracellular end of TM6 of GPBAR is displaced  
205 outwards from the receptor core to a similar extent to that in GPCR–G<sub>i</sub> or G<sub>11</sub> structures rather  
206 than GPCR–G<sub>s</sub> complex structures (Extended data Fig. 7a-7c)<sup>15,22-26</sup>. The difference in the  
207 TM6s between GPBAR and other active receptors begins at Y240<sup>6.51</sup>, a critical residue that  
208 recognizes the core scaffold of both P395 and the semisynthetic bile acid derivative INT-777,  
209 and propagates the binding signal through helix turns that enclose the residues from W237<sup>6.48</sup>  
210 to Q222<sup>6.33</sup> (Fig. 1d, Fig. 3a, 3b). Sequence alignment shows that GPBAR contains the  
211 conserved toggle switch W237<sup>6.48</sup> and proline kink P176<sup>5.50</sup> (Extended Data Fig. 7d); however,  
212 these features do not assume the same positions as presented in the β2AR–G<sub>s</sub> or A2A–G<sub>s</sub>  
213 complex structures (Fig. 3a, Extended Data Fig. 7e). In both GPBAR–G<sub>s</sub> complex structures,  
214 W237<sup>6.48</sup> of GPBAR is one helical turn lower than W286<sup>6.48</sup> of β2AR or W246<sup>6.48</sup> of A2A in  
215 their active conformations (Fig. 3a, Extended Data Fig. 7f). In the active structures of the β2AR–  
216 G<sub>s</sub> complex or the A2AR–G<sub>s</sub> complex, when compared with their inactive states, the  
217 hydrophobic interactions between the agonist and the toggle switch W<sup>6.48</sup> forced TM6 to move  
218 one step downward relative to TM3. This shift enabled W286<sup>6.48</sup> of the active β2AR to form  
219 new hydrophobic interactions with V117<sup>3.36</sup> and I121<sup>3.40</sup>. However, W286<sup>6.48</sup> of β2AR was  
220 substituted with Y240<sup>6.51</sup> of GPBAR in the same position (Fig. 3a, Extended Data Fig. 7f).  
221 GPBAR Y240<sup>6.51</sup> donates a hydrogen bond to the bound agonists, and undergoes hydrophobic  
222 stacking with F96<sup>3.36</sup> (Fig. 3b), which recalls the functions of the ‘twin-toggle-switch’ of the  
223 CB1 receptor<sup>22,27</sup>. Consistently, mutation of Y240F shows no response to P395 engagement and  
224 Y240A completely eliminated P395, INT-777 or other bile acid-induced cAMP  
225 accumulation (Fig. 3c and Extended data 7g). Collectively, the combination of structural and  
226 biochemical analyses suggests that Y240<sup>6.51</sup> is the functional “toggle switch” of the GPBAR,  
227 rather than the conventional W237<sup>6.48</sup> predicted from the sequence alignment or GPCRdb.

228 It is worth noting that engagement of the agonists with the toggle switch generally induces

229 structural rearrangement of the triad P<sup>5.50</sup>I<sup>3.40</sup>F<sup>6.44</sup> motif in solved active GPCR structures<sup>28,29</sup>.  
230 Specifically, the shift of W<sup>6.48</sup> caused a one-step downward shift of F<sup>6.44</sup> in  $\beta$ 2AR and A2AR,  
231 which allowed phenylalanine (F<sup>6.44</sup>) to fit into a hydrophobic pocket formed by I<sup>3.40</sup> as the  
232 sidewall and the proline kink P<sup>5.50</sup> at the bottom (Fig. 3d, Extended Data Fig. 7f). However, in  
233 GPBAR, the proline kink (P176<sup>5.50</sup>) moves away from F233<sup>6.44</sup>, which turns to interact with  
234 H107<sup>3.47</sup>. Instead, W237<sup>6.48</sup> in GPBAR, which is in the position equivalent to F<sup>6.44</sup> in other  
235 GPCRs, engages in hydrophobic interactions with L100<sup>3.40</sup> and L103<sup>3.43</sup> from TM3 and with  
236 V178<sup>5.32</sup> from TM5 (Fig. 3d). Notably, the distance between W237<sup>6.48</sup> and these leucines is  
237 larger than the distances between the traditional F<sup>6.44</sup> vs. I<sup>3.40</sup> pair in other receptors, and  
238 W237<sup>6.48</sup>-Y240<sup>6.51</sup> creates a bulge at the helical turn in TM6 of GPBAR, which has not been  
239 described previously for any available GPCR structures (Fig. 3d). These structural features of  
240 GPBAR contribute to the loose contact between TM3 and TM6 and between TM5 and TM6.

241 Collectively, we conclude that the sensing of agonists by Y240<sup>6.51</sup> and F96<sup>3.36</sup>, the shift of  
242 W237<sup>6.48</sup> and the rearrangement of L100<sup>3.40</sup> and V178<sup>5.32</sup> might serve as the key molecular  
243 mechanisms of GPBAR activation, mimicking the role of “toggle-switch” and PIF motif,  
244 respectively, in the classical activation pathway of the typical class A GPCRs, and therefore  
245 connect the GPBAR ligand binding pocket to the G protein interaction site. These structural  
246 and functional studies imply that the toggle switch and the PIF motif derived from the sequence  
247 alignment may not always function according to the proposed mechanism of activation in a  
248 particular GPCR; the evolution of other key residues may substitute for the functions of these  
249 well-known residues through alternative structural combinations.

### 250 **Coupling to Gs through TM bundles and ICL3 of GPBAR**

251 Due to the engagement of Gs with the extension of TM5 and TM6 and ICL3 between them,  
252 the  $\alpha$ 5 helix C-terminus of Gs does not penetrate as deeply into GPBAR as in other resolved  
253 Gs-coupled receptor complex structures (Fig. 4a, 4e). The recognition of the  $\alpha$ 5 helix of Gs by  
254 GPBAR involves TM3, TM5, TM6, ICL2 and ICL3. The resulting crevice is in general more  
255 hydrophilic compared with that in the  $\beta$ 2AR–Gs complex and TM6 helix interacts with Gs more  
256 extensively (Extended Fig. 8a-c). Residues proximal to Gs have been confirmed by mutation  
257 experiments (Extended Fig. 8a-d and Table 4-5). The divergence of the G protein subtype at the  
258 Gs L394 and E392 positions may partly contribute to the selective coupling with Gs in  
259 preference to Gq by GPBAR (Extended Fig. 8e-f).

260 Outside the TM bundle, a unique feature of the GPBAR–Gs complex structure is the  
261 electron density covering the integral ICL3 (residues R201 to L214) that contributes to both  
262 Gs binding and activation (Extended Data Fig. 3c). The ICL3 of GPBAR forms three additional  
263 helical turns at the intracellular ends of TM5 and TM6 (in comparison with the active forms of  
264  $\beta$ 2AR or A2AR) and a bulge turn of approximately 6 residues between two helices. The more

265 compact intracellular half of GPBAR brings these structures closer to Gs, leading to additional  
266 interaction at the C-terminal part of the G $\alpha$ -Ras-like domain, including the  $\beta$ 6,  $\alpha$ 4 and i3 loop  
267 (Fig. 4b)<sup>30</sup>. Importantly, three successive Arg, R201<sup>ICL3</sup>, R204<sup>ICL3</sup> and R208<sup>ICL3</sup>, form charge  
268 interactions with the acidic patch produced by the i3 knob (Fig. 4b). These interactions, together  
269 with the hydrophobic packing of ICL3 of GPBAR with the  $\alpha$ -helix 4 and the  $\beta$ -strand 6 of Gs,  
270 pull the i3 loop from T319 to D331 of Gs, corresponding to a shift of approximately 2 Å toward  
271 the receptor, inducing rearrangement of the  $\alpha$ 4- $\beta$ 6 turn and causing substantial side chain  
272 reorganization (Fig. 4b and Extended Fig.8g).

273 An inspection of the interactions between ICL3 (R201-L214) of GPBAR and Gs enabled  
274 us to deduce an R/K $\psi$ XR/KX $\psi$ XR motif that contributes to Gs recognition. Consistently,  
275 mutations of ICL3 residues of GPBAR, including R204A, V206A or R208A, significantly  
276 impaired P395-induced cAMP accumulation with respect to both potency and efficacy  
277 (Extended Fig.8h), thus confirming the importance of these specific residues in the ICL3  
278 binding motif in Gs coupling (Fig. 4b). We then questioned whether the binding of the third  
279 intracellular loop of GPCRs to Gs is a common activation mechanism utilized by a subset of  
280 GPCRs, and therefore tried to screen out receptors sharing residue arrangement in the  
281 R/K $\psi$ XR/KX $\psi$ XR motif of ICL3 by sequence alignment (Fig. 4c). Sequence searching  
282 identified that at least 3 known Gs-coupled GPCRs, including V2R, PF2R and EP2 have a  
283 minimum of 2 corresponding residues in the R/K $\psi$ XR/KX $\psi$ XR motif. Moreover, we observed  
284 that mutations in corresponding motifs in the ICL3 regions of these receptors, significantly  
285 decreased Gs activation after engaging with their agonists (Fig. 4d).

### 286 **A putative second ligand binding pocket with allosteric properties**

287 The high-quality cryo-EM density maps unveiled annular lipid molecules outside the seven  
288 transmembrane bundles in both INT-777- and P395-bound GPBAR signaling complexes  
289 (Extended Data Fig. 9a). These lipids are mostly found at the extracellular half of the receptor  
290 near the orthosteric binding pocket (Extended Data Fig. 9a). Most of these lipid binding sites  
291 are shallow indentations around the receptor surface, however, one unexpected but clear density  
292 in both cryo-EM density maps of GPBAR-Gs complexes were observed in the well-defined  
293 pocket constituted by TM3, TM4, TM5 and ICL2, where a similar lipid binding site for GPCR  
294 P2Y<sub>1</sub> (PDB ID 4XNV)<sup>31</sup> and an allosteric modulator site for GPR40<sup>32</sup> have been reported (Fig.  
295 5a and Extended Data Fig. 9b-c). We assigned a cholesterol into the electron density of second  
296 binding pocket of the P395-GPBAR-Gs complex (Fig.5a-b, and Extended Data Fig. 9c). For  
297 INT-777-GPBAR-Gs complex, both cholesterol and INT-777 could be fit into the same  
298 position. However, computational simulation indicated that both the GPBAR and the INT-777  
299 bound at orthosteric site exhibit least RMSD fluctuations in the presence of the INT-777, but  
300 not the cholesterol, CHS or no ligand at this lipid binding site (Extended Data Fig. 9d-e). We



301 therefore assigned the INT-777 at this lipid binding site and this assignment was further  
302 supported by following biochemical results (Fig.5e-g).

303 Notably, in both P395-bound– and INT-777-bound–GPBAR structures, the modeled  
304 cholesterol or INT-777 sits in a hydrophobic pocket and stabilizes the ICL2 in a loop-like  
305 conformation. Binding of a ligand at this site may release E109<sup>3,49</sup> of the conserved D/ERY  
306 motif to recognize Y391 of Gs (Fig. 5b, Extended table 6). Importantly, mutations of the amino  
307 acids involving in the second binding sites, such as L104<sup>3,44</sup> and L130<sup>4,48</sup> to alanine,  
308 significantly impaired agonist -induced cAMP accumulation, whereas mutations of surrounding  
309 residues, such as the two Pro residues (P120G and P121G), had no significant effects (Fig.  
310 5d, Extended table 4). These results suggest that a ligand bound to the second binding site  
311 might positively modulate the activation of GPBAR, which is likely due to further stabilizing  
312 the ICL2 in a conformation more readily for Gs coupling (Fig. 5b-5c, Extended table 6- 8).

313 Considering INT-777 is a bile acid derivative, we suspected that INT-777 and other bile  
314 acids may be able to bind to this second pocket in GPBAR and that the bound bile acids may  
315 allosterically regulate receptor activity. We next screened all nine commercially available bile  
316 acids for their allosteric cooperativities. Notably, five of them, including CA, DCA, GCA, TCA  
317 and TDCA, showed modest but robust positive cooperative effects for GPBAR activation in  
318 response to the P399 interaction (Fig. 5e-5f and Extended table 9). Intriguingly, all five bile  
319 acids bearing allosteric properties contain a hydroxyl group substitution at position 12, whereas  
320 the other 4 bile acids do not, indicating a strong structural-function relationship (Fig. 5e). We  
321 next mutated all 8 residues surrounding the second bile acid binding site and test the positive  
322 cooperative effects using the five bile acids showing allosteric properties. Connecting to the  
323 orthosteric site, only the upper 4 residue mutations impaired the allosteric properties of all 5  
324 bile acids (Fig. 5e and 5g). Importantly, the T131A mutation, which disrupted a potential H-  
325 bond between the 12-hydroxyl group of modeled INT-777 and other bile acid, abolished this  
326 positive cooperativity for all 5 bile acids (Fig. 5e,5g and Extended table 10). This observation  
327 is consistent with the observation that only bile acids bearing the 12-OH group exhibited  
328 allosteric functions. Taken together, these results demonstrated that the binding of bile acids  
329 bearing a 12-OH group to the second bile acid binding pocket of GPBAR has a positive  
330 allosteric effect on its orthosteric agonist binding and activity (Fig. 5d-5e).

### 331 **Structural basis of the biased property of INT-777**

332 The arrestin-mediated GPBAR functions, which may contribute to the diverse signaling  
333 and cellular outputs elicited by different GPBAR ligands, have only recently begun to be  
334 appreciated<sup>14</sup>. Interestingly, the synthetic GPBAR agonist P395 was biased more heavily  
335 toward  $\beta$ -arrestin, with a  $\beta$  value of -0.46, whereas INT-777 displayed a bias property toward  
336 Gs, with a  $\beta$  value of 0.57, considering the endogenous bile acid LCA as a reference (Fig. 6a,  
337 Extended Data Fig. 10a). The  $\beta$  value was calculated through the operational model, which

338 reflects the differences of both the efficacy and potency of two different pathways<sup>33,34</sup>. Thus, a  
339 comparison of the INT-777–GPBAR complex structure with the P395–GPBAR complex  
340 structure could shed light on the structural basis of GPBAR signaling bias<sup>35</sup>.

341 Although the overall structure of the INT-777–GPBAR complex is similar to that of the  
342 P395–GPBAR complex, the structural differences in specific residues may contribute to the  
343 signaling bias. Analysis of the root-mean-square deviation (RMSD) over C $\alpha$  atoms between  
344 INT-777– and P395–bound GPBAR structures indicated that the most significant differences  
345 between INT-777– and P395–bound GPBAR structures were within the three extracellular  
346 loops and ICL1 (Fig. 6b, Extended Data Fig. 10b). We therefore performed alanine scanning  
347 mutagenesis of the residues with significant conformational differences (RMSD of C $\alpha$  are  
348 larger than 2 Å) between the two structures and then examined the effects of the mutants on  
349 both Gs and arrestin downstream signaling. Mutation of Q77<sup>ECL1</sup>, P151<sup>ECL2</sup>, and P256<sup>ECL3</sup> to  
350 alanine resulted in a significant decrease in arrestin recruitment that exceeded the decrease in  
351 cAMP accumulation (Fig. 6c-6d and Extended Data Fig. 10b-c). In addition to observations  
352 that were consistent with the previous finding that ECL3 in the GLP-1 receptor contributed to  
353 the bias property<sup>36</sup>, we found that ECL1 and ECL2 regions of GPBAR also contributed to  
354 arrestin-biased activation. In particular, the flipping of large side chains by Q77<sup>ECL1</sup> and  
355 P151<sup>ECL2</sup> and the correlated mutating effects on bias property changes indicated a potential  
356 structural-function relationship at these two extracellular loops. Another important  
357 conformational difference between INT-777– and P395–bound GPBAR was observed in ICL1  
358 (Fig. 6b). Mutations of R44<sup>ICL1</sup> and L45<sup>ICL1</sup> to alanine significantly decreased arrestin  
359 recruitment but had little effect on Gs coupling (Fig. 6c-6d and Extended Data 10 b). Consistent  
360 with this finding, a direct interaction between ICL1 of GPBAR and Gs was not found in either  
361 structure.

362 Importantly, previous studies only identified that biased function of the exendin-P5–GLP-  
363 1R–Gs complex structure is mainly conferred by its increased Gs coupling activity without  
364 significant effects on arrestin coupling<sup>36</sup>. Conversely, our present results demonstrated that  
365 GPBAR gained biased properties through the regulation of arrestin activity without affecting  
366 Gs signaling, as mutations of Q77<sup>ECL1</sup>, P256<sup>ECL3</sup> and R44<sup>ICL1</sup>L45<sup>ICL1</sup> to Ala diminished arrestin  
367 recruitment without significantly affecting Gs activation (Extended Data Fig. 10b). The  
368 identified ECL1 and ECL3 regions important for biased signaling of GPBAR are more diverse  
369 than the previously identified ECL3 region for GLP-1R<sup>36</sup>. Furthermore, we anticipate that  
370 R44<sup>ICL1</sup>L45<sup>ICL1</sup> in GPBAR could be the direct binding site of arrestin but not Gs. Therefore, our  
371 study supports the idea that biased signaling could be regulated through allosteric coupling of  
372 diverse regions from extracellular to intracellular portions.

373

374 **Discussion**

375 The cryo-EM structures obtained in this study revealed a large oval pocket to  
376 accommodate the large steroid core of bile acids, sporadic hydrophilic residues on one side,  
377 along with hydrophobic residues on the opposite side, underlying the molecular mechanism  
378 of recognition of an ampholytic ligand by GPBAR. Moreover, key residues inside the  
379 orthosteric pocket are identified as important fingerprint readers to discriminate different bile  
380 acids with substitutions at the 7 (R1) and 12 (R2) positions and the conjugating groups at the  
381 C-termini of the steroid core. These specific interactions, as well as the identification of only  
382 bile acids with a structural feature of 12-OH substitutions to afford allosteric cooperative effects,  
383 may account for the different potencies and efficacies of bile acids in cAMP accumulation and  
384 diverse downstream functions through GPBAR activation.

385 Along and below the ligand binding pocket, there was an unusual separation of TM6 from  
386 central TM3, likely due to the absence of P<sup>5.50</sup>I<sup>3.40</sup>F<sup>6.44</sup> motif packing in the GPBAR structure.  
387 This conserved packing functions to tether the TM3-TM5-TM6 bundles in other active GPCR  
388 structures (Fig. 4e). Notably, the structural rearrangement of the P<sup>5.50</sup>I<sup>3.40</sup>F<sup>6.44</sup> and  
389 N<sup>7.45</sup>P<sup>7.46</sup>XXY<sup>7.49</sup> motifs, as well as the shift of the “toggle switch” W<sup>6.48</sup>, are hallmarks for all  
390 known active class A GPCR structures determined to date<sup>28,29</sup>. However, GPBAR does not  
391 contain the conserved NPXXY motif, and its TM bundles in the active state are linked by  
392 V178<sup>5.52</sup>L100<sup>3.40</sup>W237<sup>6.48</sup> packing rather than tethering by the traditional P<sup>5.50</sup>I<sup>3.40</sup>F<sup>6.44</sup> motif,  
393 suggesting that diverse structural motifs exist among GPCRs to connect the ligand binding  
394 pocket to the G protein coupling site, despite their evolutionary closeness and similar key  
395 residues according to their Ballesteros-Weinstein numbers. Our mutagenesis and structural  
396 observations also suggested that the interactions among Y240, S247 and L166 form a potential  
397 hub for maintaining the inactive state of GPBAR, whereas engaging with Y240 with an H-bond  
398 and hydrophobic interactions provided by a ligand may induce both the Y240<sup>6.51</sup> and W237<sup>6.48</sup>  
399 switches to activate GPBAR.

400 In particular, both GPBAR–Gs complex structures revealed the coupling of GPBAR to the  
401 Gs protein through ICL3 of the receptor (Fig. 4e). In general, the function of the ICL3 region  
402 in GPCRs has not been defined, and no receptor–Gs complex structure has shown the integral  
403 electron density of the ICL3 to disclose its functions in effector coupling. Our structural analysis  
404 and biochemical study suggest that an R/KψXR/KXψXR motif in ICL3 could be a general  
405 mechanism utilized by a group of GPCRs to couple to Gs. These observations suggested that  
406 the coupling of ICL3 of GPCRs to G proteins could be important for effector activation in many  
407 cases, representing a mechanism that has not been previously recognized.

408

## 409 **ACKNOWLEDGEMENTS**

410

411 We acknowledge support from the National Key Basic Research Program of China Grant  
412 2018YFC1003600 to X.Y. and J.-P.S., the National Science Fund for Distinguished Young  
413 Scholars Grant (81773704 to J.-P.S. 81425024 to X.X.), the National Science Fund for Excellent  
414 Young Scholars Grant (81822008 to X.Y., 81922071 to Y.Z.), Zhejiang Province National  
415 Science Fund for Excellent Young Scholars LR19H310001 to Y.Z., the National Natural  
416 Science Foundation of China Grant (31900936 to F.Y., 81730099 to X.X.) the China  
417 Postdoctoral Science Foundation Grant 2019T120587 to F.Y. and Innovative Research Team in  
418 University Grant IRT\_17R68 (to X.Y. and Y.S.). Sample preparation for cryo-EM studies was  
419 supported by Protein Facility, Zhejiang University School of Medicine. The cryo-EM data were  
420 collected at the Center of Cryo-Electron Microscopy, Zhejiang University, with assistance of  
421 S. Chang and X. Zhang.

422

### 423 **AUTHOR CONTRIBUTIONS**

424 Y.Z., X.X., X.Y., and J.-P.S. organized the whole project. J.-P.S., Y.Z., X.Y., X.X., supervised  
425 the overall project design and execution. Y.Z. guided all the Cryo-EM study. Y.Z. and J.-P.S.  
426 guided all structural analysis. X.X. provided all ligand study and chemical guidance. X.Y.  
427 initiated the study of recognition mechanism of bile acid, allosteric assays and bile acid  
428 derivatives by GPBAR and designed the screening assay for complex formation. J.-P.S., X.Y..  
429 designed all cellular experimental details. F.Y., L.L.G. and P.X. developed the GPBAR  
430 constructs and optimized protein expression. F.Y., L.L.G. and P.X. established P395/INT-777–  
431 GPBAR–Gs complex formation strategy; F.Y., L.L.G., P.X. and X.W. screened the bile acids  
432 or its derivatives for complex formation. F.Y., L.L.G., P.X. and X.W. performed virus  
433 production, insect cell expression and prepared samples for cryo-EM. F.Y., L.G. developed the  
434 method for solubilization of the bile acids advised by Y.Z., J.-P.S. and X.Y. F.Y., L.L.G.  
435 screened conditions for gel filtration. D.-D.S. evaluated the sample by negative-stain EM;  
436 C.Y.M. prepared the cryo-EM grids; C.Y.M., D.-D.S. collected the cryo-EM data with  
437 assistance from Q.Y.S.; C.Y.M. and Q.Q.M. performed cryo-EM map calculation, model  
438 building and structure refinement. C.M. assisted in protein purification in Protein Facility.  
439 L.L.G., P.X. and K.Z. performed pull down assay. X.Y., Y.Z., J.-P.S. and X.X. designed all the  
440 mutants for ligand binding pocket and second bile acid binding site. X.Y. designed the biased  
441 signaling assay. X.Y. and J.P.S. designed the experiments for characterization of bile acid  
442 binding patterns of GPBAR. X.Y. designed the cooperative assay for allosteric  
443 mechanism. Q.Y.S. carried out the computational simulations. J.Y.L. performed cooperative  
444 assay and data analysis. X.W., L.L.G., J.Y.L., S.M.G., L.Q.Z., F.Yi., Y.Q.P., X.Y.L. and K.Z.  
445 performed cAMP accumulation assay and binding assay. X.W., Y.Q.P., R.R.L. and S.M.G.  
446 performed BRET assay. Y.M.S., F.Yi., J.Y.Z. and C.T.J. participated in the design and

447 explanation of the cAMP and BRET results and provided insightful ideas and experimental  
448 designs. V.C.L. oversaw the structural analysis. J.-P.S. wrote the manuscript. All the authors  
449 have seen and commented on the manuscript.

450

451 **COMPETING INTERESTS:** The authors declare no competing interests.

452

### 453 **Figure legends**

454

#### 455 **Figure 1 Cryo-EM structure of 395–GPBAR–Gs and INT-777–GPBAR–Gs complex.**

456 **a-b** Cryo-EM density (left panel) and ribbon representation (right panel) of the P395–  
457 GPBAR–Gs complex (a) or INT-777–GPBAR–Gs complex (b). P395, magentas; GPBAR (a),  
458 slate; G $\alpha$ s, yellow; G $\beta$ , cyan; G $\gamma$ , light blue; Nb35, gray; INT-777, blue; GPBAR (b), green.  
459 **c**, Ribbon representation of the larger separation of TM3 and TM6 in active GPBAR compared  
460 to that in active  $\beta$ 2AR (PDB ID 3SN6) in complex with Gs, inactive  $\beta$ 2AR stabilized by an  
461 antagonist (PDB ID 3NYA), active A2AR in complex with miniGs (PDB ID 5G53) and inactive  
462 A2AR (PDB ID 3EML).

463 **d**, Plot of C $\alpha$  distances of residues between TM3 and TM6 of active GPBAR, active/inactive  
464 A2AR and active/inactive  $\beta$ 2AR.

465 **e**, Structural view of the insertion of P395 into the ligand pocket composed of residues from  
466 TM2, TM3, TM6 and TM7 and enclosed by three extracellular loops. The hydrogen bond is  
467 depicted as a dashed line. A notable feature of the interactions between P395 and GPBAR is  
468 their hydrophobic nature, with ten hydrophobic residues involved and only one polar contact.

469 **f**, Detailed interactions between INT-777 and the GPBAR. Hydrogen bonds are highlighted  
470 with red dashes.

#### 471 **Figure 2 Structural fingerprints of GPBAR recognizing different bile acids.**

472 **a**, Diagram of the fingerprint that differentiates diverse bile acids (left panel). The 7 (R1), 12  
473 (R2) and C-terminal (R3) positions are the most common substitution or conjugating sites in  
474 the primary bile acid CA to generate diverse bile acids, which are shown in red. Residues shown  
475 for interaction with the R1, R2 and R3 positions in GPBAR are shaded in red, green, and yellow,  
476 respectively. Substitution and conjugation status of INT-777, CA and several different bile acids  
477 at the R1, R2 and R3 positions are summarized in a table shown on the right panel.

478 **b**, Diagram of the potential primary bile acid Cholic Acid (CA) interaction in the ligand binding  
479 pocket of GPBAR. Blue, residues located in the INT-777 binding pocket and shown mutating  
480 effects on both CA and INT-777; Green, residues with mutating effects only on INT-777, but  
481 not CA. The mutating effects were referred to Extended data 5c-d.

482 **c-e**, Effects of bile acid recognition fingerprint mutants on cAMP accumulation induced by  
483 different bile acids. (c), mutation of L244 to A; (d), mutation of L266 to A; (e), mutation of

484 L263 to A. The fold of EC50 change of mutant vs. wild type for each individual bile acid were  
485 used for straightforward view. The original data were referred to Extended data 6. Values  
486 are the mean  $\pm$  SEM of three independent experiments for the wild type (WT) and mutants.  
487 Statistical differences between WT and mutations were determined by One-way ANOVA (\*\*,  
488  $P < 0.01$ ; \*\*\*,  $P < 0.001$ , n.s., no significant difference)

489

### 490 **Figure 3 An unexpected activation mechanism of GPBAR.**

491 **a**, Structural representation of the important residues participating in GPBAR activation,  
492 including Y240<sup>6.51</sup>, the presumed toggle switch W237<sup>6.48</sup>, the L100<sup>3.40</sup> and F233<sup>6.44</sup> of the  
493 P<sup>5.50</sup>I<sup>3.40</sup>F<sup>6.44</sup> motif, and compared them with their counterparts in the inactive  $\beta$ 2AR (PDB ID  
494 3NYA) and the active  $\beta$ 2AR in complex with the agonist BI and Gs (PDB ID 3SN6). Notably,  
495 Y240<sup>6.51</sup> of GPBAR assumes the same position as W286<sup>6.48</sup> in the  $\beta$ 2AR-Gs complex, which  
496 undergoes a downshift of one helical turn in relation to TM3 during the transition from the  
497 inactive to the active state.

498 **b**, Cutaway view of key residues governing GPBAR activation in response to P395 binding.

499 **c**, Dose response curves of GPBAR carrying mutations in the key residues involved in  
500 activation in the cAMP accumulation assay in response to P395. Whereas the F233A has very  
501 little effect on P395 induced cAMP accumulation, the Y240A and Y240F totally eliminated the  
502 response to P395 engagement. There is a significant high level basal activity of the Y240F  
503 mutant. Data are shown as mean  $\pm$  SEM from three independent measurements.

504 **d**, Lack of the compact structural P<sup>5.50</sup>I<sup>3.40</sup>F<sup>6.44</sup> motif in GPBAR structure. Left, structural  
505 rearrangement of the PIF motif during  $\beta$ 2AR activation. Right, separation of P<sup>5.50</sup>L<sup>3.40</sup>F<sup>6.44</sup> in  
506 the GPBAR structure. Instead, W237<sup>6.48</sup> forms hydrophobic interactions with L100<sup>3.40</sup> and  
507 V178<sup>5.52</sup> to constitute a VLW motif in GPBAR.

508

### 509 **Figure 4 The coupling of GPBAR to Gs.**

510 **a**, Schematic representation of the downshift of the  $\alpha$ 5 helix of the Ras-like domain of Gs,  
511 which is potentially due to the longer extension of TM6, the rigidity of ICL3 of GPBAR and  
512 its strong interaction with Gs. Ribbon representation: GPBAR, slate;  $\beta$ 2AR, green;  $\alpha$ 5-helix of  
513 Gs bound to  $\beta$ 2AR, grey;  $\alpha$ 5-helix of Gs bound to GPBAR, yellow. Surface representation: Gs  
514 bound to  $\beta$ 2AR, grey; Gs bound to GPBAR, yellow.

515 **b**, Specific interactions of the ICL3 of GPBAR with the Ras-like domain of Gs. An overall view of  
516 GPBAR ICL3 and Gs interaction are shown on right upper panel. The ICL3 of GPBAR, i3-loop,  $\beta$ 6  
517 and  $\alpha$ 4 of Gs are highlighted. Specific charge interactions and hydrophobic interactions (lower right  
518 panel) are depicted between the interface of the GPBAR ICL3 and Gs.

519 **c**, Sequence comparisons of several known Gs-coupled GPCRs that have similar residues to  
520 the R/K $\psi$ XR/KX $\psi$ XR motif in ICL3, including GPBAR, V2R, PF2R and EP2. Residues that  
521 are in consistent with this motif are shaded with yellow.

522 **d**, Effects of ICL3 mutations in the R/K $\psi$ XR/KX $\psi$ XR motifs of V2R  
523 (R243A/R247A/R249A/R251A), PF2R (R238A/R241A/HR243A) and EP2 (R242A/R249A)  
524 on their agonist-induced cAMP accumulation. Data are shown as mean  $\pm$  SEM from three  
525 independent measurements.

526 **e**, A cartoon model illustrating the structural differences of the activation and Gs coupling of  
527 GPBAR compared to the other class A GPCR-Gs or GPCR-Gi complexes. From the left to  
528 right is the inactive GPCR structural model (using  $\beta$ 2AR as an example, PDB ID 3NYA), the  
529 general GPCR-Gs complex (using  $\beta$ 2AR as an example, PDB ID 3SN6), the GPBAR-Gs  
530 complex and the NTSR-Gi complex (PDB ID 6OS9). Compared to other class A GPCR-Gs  
531 complexes or NTSR-Gi complex, the GPBAR-Gs complex exhibits distinct features, first a  
532 larger separation at the TM3-TM6 helices in the center of receptor region, second the H5 of Gs  
533 in GPBAR-Gs complex showing one helical turn downshifting probably due to the direct  
534 interaction of the ICL3 of GPBAR with the Gs.

535

536 **Figure 5 The second ligand binding pocket and its allosteric effect.**

537 **a**, A cartoon presentation of GPBAR complex highlighting the existence of a potential second  
538 ligand binding pocket of GPBAR. Upper, an INT-777 bound to the orthosteric site, Lower left,  
539 an INT-777 molecular binds to an allosteric site. The two sites are mainly connected by TM3.

540 **b**, Possible interactions between the modelled cholesterol with TM2, TM3, TM4 and TM5 of  
541 the receptor. Residues constituted the second ligand binding site (side chains located within 4Å  
542 between the modelled P395 and the GPBAR) are highlighted in stick. This model was used for  
543 further mutagenesis validation.

544 **c**, Possible interactions between the modelled second INT-777 with TM2, TM3, TM4 and TM5  
545 of the receptor. Residues constituted the second ligand binding site (side chains located within  
546 4Å between the modelled INT-777 and the GPBAR) are highlighted in stick. The model was  
547 then used for mutagenesis evaluation.

548 **d**, Effects of different second binding pocket mutations on the efficacy of P395-induced cAMP  
549 accumulation. Values are the mean  $\pm$  SEM of three independent experiments for the wild type  
550 (WT) and mutants. Statistical differences between WT and mutations were determined by One-  
551 way ANOVA (\*\*,  $P < 0.01$ ; \*\*\*,  $P < 0.001$ , n.s., no significant difference)

552 **e**, Diagram of the potential interacting mode of bile acid within the allosteric ligand binding  
553 pocket of GPBAR. Five bile acids, including CA, DCA, GDA, TCA and TDCA who share the  
554 common 12-OH substitution, engaged with T131 in the second ligand binding pocket, which is

555 essential for the allosteric effects. Other upper four residues, including L104, L105, P135 and  
556 L173 in the second ligand binding pocket, also mediates the allosteric effects.

557 **f**, Allosteric effects of different bile acids toward P399 induced cAMP accumulation. The max  
558 of allosteric cooperativity (AC-max) derived from the dose response curve was shown. The  
559 original data is referred to Extended data table 9.

560 **g**, The effects of mutations of residues in second ligand binding pocket on the allosteric effects  
561 of different bile acids. The original data was referred to Extended table 10.

562 **d, f, g**: EC50 values or Allosteric cooperativity max are the mean  $\pm$  SEM of at least 3  
563 independent experiments. Statistical differences between WT and mutations were determined  
564 by One-way ANOVA (\*,  $P < 0.05$ ; \*\*,  $P < 0.01$ ; \*\*\*,  $P < 0.001$ , n.s., no significant difference).

565

### 566 **Figure 6 Structural basis of the biased agonism by INT-777.**

567 **a**, Comparison of the biased properties of INT-777 and P395. Both INT-777 and P395 were  
568 assessed for cAMP signalling (left panel) and  $\beta$ -arrestin-2 recruitment (middle panel). The bias  
569 factor ( $\beta$  value) of P395 was calculated using a native bile acid LCA as the reference. The p395  
570 is a  $\beta$ -arrestin-2 biased ligand with respect to INT-777.  $\beta > 0$  indicates Gs biased,  $\beta < 0$  indicates  
571 arrestin biased. The significant negative  $\beta$  value clearly indicates that P395 is a  $\beta$ -arrestin-biased  
572 ligand. Data from three independent experiments are presented as mean  $\pm$  SD.

573 **b**, Plot of the distance root-mean-square deviations (RMSDs) of each residue between INT-  
574 777-GPBAR and P395-GPBAR structures. The horizontal and vertical axes indicate the amino  
575 acid sequence of the GPBAR and the RMSDs ( $C\alpha$  deviations) for every residue, respectively.  
576 The red, blue, green and grey dots represent  $C\alpha$  deviations that range from  $>3$ ,  $2\sim 3$ ,  $1\sim 2$  or  $<1$ ,  
577 respectively.

578 **c**, Extracellular view of the GPBAR transmembrane bundle showing the location of the residues  
579 with different RMSD between INT-777- and P395-bound GPBAR, coloured in green and grey  
580 respectively. Residues with significant conformational changes, including Q77 and P151, as  
581 well as the potential arrestin interaction sites R44 and L45 are highlighted in red.

582 **d**, Biased property analysis of the residues highlighted in (c).  $\beta$  values calculated from the  
583 molecular efficacies of P395. Positive  $\beta$  values denote Gs-biased signalling using WT GPBAR  
584 as the reference.  $\beta$  values are calculated from at least 3 independent experiments.

585

586

### 587 **References**

588

589 1 Jia, W., Xie, G. & Jia, W. Bile acid-microbiota crosstalk in gastrointestinal inflammation  
590 and carcinogenesis. *Nature reviews. Gastroenterology & hepatology* **15**, 111-128,  
591 (2018).



- 592 2 Qi, X. *et al.* Gut microbiota-bile acid-interleukin-22 axis orchestrates polycystic ovary  
593 syndrome. *Nature medicine* **25**, 1225-1233, (2019).
- 594 3 Perino, A. & Schoonjans, K. TGR5 and Immunometabolism: Insights from Physiology and  
595 Pharmacology. *Trends in pharmacological sciences* **36**, 847-857, (2015).
- 596 4 McGavigan, A. K. *et al.* TGR5 contributes to gluco regulatory improvements after vertical  
597 sleeve gastrectomy in mice. *Gut* **66**, 226-234, (2017).
- 598 5 Watanabe, M. *et al.* Bile acids induce energy expenditure by promoting intracellular  
599 thyroid hormone activation. *Nature* **439**, 484-489, (2006).
- 600 6 Schaap, F. G., Trauner, M. & Jansen, P. L. Bile acid receptors as targets for drug  
601 development. *Nature reviews. Gastroenterology & hepatology* **11**, 55-67, (2014).
- 602 7 Woo, S. J., Kim, J. H. & Yu, H. G. Ursodeoxycholic acid and tauroursodeoxycholic acid  
603 suppress choroidal neovascularization in a laser-treated rat model. *Journal of ocular  
604 pharmacology and therapeutics : the official journal of the Association for Ocular  
605 Pharmacology and Therapeutics* **26**, 223-229, (2010).
- 606 8 Pols, T. W., Noriega, L. G., Nomura, M., Auwerx, J. & Schoonjans, K. The bile acid  
607 membrane receptor TGR5 as an emerging target in metabolism and inflammation.  
608 *Journal of hepatology* **54**, 1263-1272, (2011).
- 609 9 Guo, C. *et al.* Cholesterol Homeostatic Regulator SCAP-SREBP2 Integrates NLRP3  
610 Inflammasome Activation and Cholesterol Biosynthetic Signaling in Macrophages.  
611 *Immunity* **49**, 842-856 e847, (2018).
- 612 10 Perino, A. *et al.* TGR5 reduces macrophage migration through mTOR-induced  
613 C/EBPbeta differential translation. *The Journal of clinical investigation* **124**, 5424-5436,  
614 (2014).
- 615 11 Velazquez-Villegas, L. A. *et al.* TGR5 signalling promotes mitochondrial fission and beige  
616 remodelling of white adipose tissue. *Nature communications* **9**, 245, (2018).
- 617 12 Thomas, C. *et al.* TGR5-mediated bile acid sensing controls glucose homeostasis. *Cell  
618 Metab* **10**, 167-177, (2009).
- 619 13 Hu, M. M. *et al.* Virus-induced accumulation of intracellular bile acids activates the  
620 TGR5-beta-arrestin-SRC axis to enable innate antiviral immunity. *Cell research* **29**, 193-  
621 205, (2019).
- 622 14 Ballesteros, J. A. W., H. in *Receptor Molecular Biology*, vol. 25 (ed. Sealson, S. C.) Ch. 19  
623 (Elsevier, 1995).
- 624 15 Garcia-Nafria, J., Lee, Y., Bai, X., Carpenter, B. & Tate, C. G. Cryo-EM structure of the  
625 adenosine A2A receptor coupled to an engineered heterotrimeric G protein. *eLife* **7**,  
626 (2018).
- 627 16 Rasmussen, S. G. *et al.* Crystal structure of the beta2 adrenergic receptor-Gs protein  
628 complex. *Nature* **477**, 549-555, (2011).
- 629 17 Piotrowski, D. W. *et al.* Identification of Tetrahydropyrido[4,3-d]pyrimidine Amides as a  
630 New Class of Orally Bioavailable TGR5 Agonists. *ACS medicinal chemistry letters* **4**, 63-  
631 68, (2013).
- 632 18 Agarwal, S. *et al.* Discovery of a Potent and Orally Efficacious TGR5 Receptor Agonist.  
633 *ACS medicinal chemistry letters* **7**, 51-55, (2016).
- 634 19 Isberg, V. *et al.* Generic GPCR residue numbers - aligning topology maps while minding  
635 the gaps. *Trends in pharmacological sciences* **36**, 22-31, (2015).

- 636 20 Cherezov, V. *et al.* High-resolution crystal structure of an engineered human beta(2)-  
637 adrenergic G protein-coupled receptor. *Science (New York, N.Y.)* **318**, 1258-1265,  
638 (2007).
- 639 21 Rosenbaum, D. M. *et al.* GPCR engineering yields high-resolution structural insights into  
640 beta2-adrenergic receptor function. *Science (New York, N.Y.)* **318**, 1266-1273, (2007).
- 641 22 Krishna Kumar, K. *et al.* Structure of a Signaling Cannabinoid Receptor 1-G Protein  
642 Complex. *Cell* **176**, 448-458 e412, (2019).
- 643 23 Kato, H. E. *et al.* Conformational transitions of a neurotensin receptor 1-Gi1 complex.  
644 *Nature* **572**, 80-85, (2019).
- 645 24 Kang, Y. *et al.* Cryo-EM structure of human rhodopsin bound to an inhibitory G protein.  
646 *Nature* **558**, 553-558, (2018).
- 647 25 Garcia-Nafria, J., Nehme, R., Edwards, P. C. & Tate, C. G. Cryo-EM structure of the  
648 serotonin 5-HT1B receptor coupled to heterotrimeric Go. *Nature* **558**, 620-623, (2018).
- 649 26 Maeda, S., Qu, Q., Robertson, M. J., Skiniotis, G. & Kobilka, B. K. Structures of the M1 and  
650 M2 muscarinic acetylcholine receptor/G-protein complexes. *Science (New York, N.Y.)*  
651 **364**, 552-557, (2019).
- 652 27 Hua, T. *et al.* Crystal structures of agonist-bound human cannabinoid receptor CB1.  
653 *Nature* **547**, 468-471, (2017).
- 654 28 Latorraca, N. R., Venkatakrisnan, A. J. & Dror, R. O. GPCR Dynamics: Structures in  
655 Motion. *Chem Rev* **117**, 139-155, (2017).
- 656 29 Weis, W. I. & Kobilka, B. K. The Molecular Basis of G Protein-Coupled Receptor  
657 Activation. *Annual review of biochemistry* **87**, 897-919, (2018).
- 658 30 Sprang, S. R. G protein mechanisms: insights from structural analysis. *Annual review of*  
659 *biochemistry* **66**, 639-678, (1997).
- 660 31 Zhang, D. *et al.* Two disparate ligand-binding sites in the human P2Y1 receptor. *Nature*  
661 **520**, 317-321, (2015).
- 662 32 Lu, J. *et al.* Structural basis for the cooperative allosteric activation of the free fatty acid  
663 receptor GPR40. *Nature structural & molecular biology* **24**, 570-577, (2017).
- 664 33 Li, A. *et al.* Discovery of novel FFA4 (GPR120) receptor agonists with beta-arrestin2-  
665 biased characteristics. *Future medicinal chemistry* **7**, 2429-2437, (2015).
- 666 34 Rajagopal, S. *et al.* Quantifying ligand bias at seven-transmembrane receptors.  
667 *Molecular pharmacology* **80**, 367-377, (2011).
- 668 35 Smith, J. S., Lefkowitz, R. J. & Rajagopal, S. Biased signalling: from simple switches to  
669 allosteric microprocessors. *Nature reviews. Drug discovery* **17**, 243-260, (2018).
- 670 36 Liang, Y. L. *et al.* Phase-plate cryo-EM structure of a biased agonist-bound human GLP-  
671 1 receptor-Gs complex. *Nature* **555**, 121-125, (2018).
- 672 37 Zheng, S. Q. *et al.* MotionCor2: anisotropic correction of beam-induced motion for  
673 improved cryo-electron microscopy. *Nature methods* **14**, 331-332, (2017).
- 674 38 Zhang, K. Gctf: Real-time CTF determination and correction. *Journal of structural biology*  
675 **193**, 1-12, (2016).
- 676 39 Scheres, S. H. RELION: implementation of a Bayesian approach to cryo-EM structure  
677 determination. *Journal of structural biology* **180**, 519-530, (2012).
- 678 40 Heymann, J. B. Guidelines for using Bsoft for high resolution reconstruction and  
679 validation of biomolecular structures from electron micrographs. *Protein science : a*

- 680 *publication of the Protein Society* **27**, 159-171, (2018).
- 681 41 Adams, P. D. *et al.* PHENIX: a comprehensive Python-based system for macromolecular  
682 structure solution. *Acta crystallographica. Section D, Biological crystallography* **66**, 213-  
683 221, (2010).
- 684 42 Pettersen, E. F. *et al.* UCSF Chimera--a visualization system for exploratory research and  
685 analysis. *Journal of computational chemistry* **25**, 1605-1612, (2004).
- 686 43 Emsley, P. & Cowtan, K. Coot: model-building tools for molecular graphics. *Acta*  
687 *crystallographica. Section D, Biological crystallography* **60**, 2126-2132, (2004).
- 688 44 Afonine, P. V. *et al.* New tools for the analysis and validation of cryo-EM maps and  
689 atomic models. *Acta crystallographica. Section D, Structural biology* **74**, 814-840, (2018).
- 690 45 Goddard, T. D. *et al.* UCSF ChimeraX: Meeting modern challenges in visualization and  
691 analysis. *Protein science : a publication of the Protein Society* **27**, 14-25, (2018).
- 692 46 Schrödinger. The PyMOL Molecular Graphics System, Version 2.0.
- 693
- 694

## 695 **METHODS**

696

697 **Cryo-EM data acquisition.** The purified P395-GPBAR-Gs complex (3.0  $\mu$ L) at 4.0 mg/ml  
698 and INT-777-GPBAR-Gs complex (3.0  $\mu$ L) at 4.5 mg/ml were applied onto a glow-discharged  
699 holey carbon grid (Quantifoil R1.2/1.3), and subsequently vitrified using a Vitrobot Mark IV  
700 (Thermo Fischer Scientific). Cryo-EM imaging was performed on a Titan Krios equipped with  
701 a Gatan K2 Summit direct electron detector in the Center of Cryo-Electron Microscopy,  
702 Zhejiang University (Hangzhou, China). The microscope was operated at 300kV accelerating  
703 voltage, at a nominal magnification of 29,000 $\times$  in counting mode, corresponding to a pixel size  
704 of 1.014  $\text{\AA}$ . In total, 4826 movies of P395-GPBAR-Gs complex and 6229 movies of INT-777-  
705 GPBAR-Gs complex (1<sup>st</sup>, 4153 movies; 2<sup>nd</sup>, 2076 movies) were obtained at a dose rate of about  
706 7.8 electrons per  $\text{\AA}^2$  per second with a defocus range of -0.5 to -2.5  $\mu$ m. The total exposure time  
707 was 8 s and intermediate frames were recorded in 0.2 s intervals, resulting in an accumulated  
708 dose of 62 electrons per  $\text{\AA}^2$  and a total of 40 frames per micrograph.

709

710 **Image processing and 3D reconstruction.** Dose-fractionated image stacks were subjected to  
711 beam-induced motion correction using MotionCor2.1<sup>37</sup>. A sum of all frames, filtered according  
712 to the exposure dose, in each image stack was used for further processing. Contrast transfer  
713 function (CTF) parameters for each non-dose weighted micrograph were determined by Gctf<sup>38</sup>.

714 Particle selection, 2D and 3D classifications were performed on a binned dataset with a pixel  
715 size of 2.028 Å using RELION-3.0-beta2<sup>39</sup>. Semi-automated selected particles were subjected  
716 to reference-free 2D classification, producing particles with well-defined averages for further  
717 processing. The map of PTH<sub>1</sub>R–Gs complex (EMDB-0410) low-pass filtered to 20 Å was used  
718 as an initial reference model for 3D classification. Conformationally homogeneous subsets  
719 showed detailed features for all subunits were subjected to further 3D classification focusing  
720 the alignment on the complex with the exception of AHD of the G $\alpha$ s, produced one stable  
721 subsets accounting for 185,911 and 92,816 particles for two datasets, respectively. The two  
722 datasets were subsequently combined and subjected to 3D refinement and Bayesian polishing  
723 and frames 1-20 were used in the final refinement to reduce background noise and improve EM  
724 map quality. The final map has an indicated global resolution of 3.0 Å at a Fourier shell  
725 correlation of 0.143. Local resolution was determined using the Bsoft package with half maps  
726 as input maps<sup>40</sup>.

727

728 **Model building and refinement.** The initial homology model of GPBAR was generated using  
729 Phyre2. The  $\beta$  2 AR–Gs protein complex (PDB ID 3SN6) was to generate the initial models of Gs  
730 and Nb35.. Agonist and lipid coordinates and geometry restraints were generated using  
731 phenix.elbow<sup>41</sup>. Models were docked into the EM density map using UCSF Chimera<sup>42</sup>. This  
732 starting model was then subjected to iterative rounds of manual adjustment and automated  
733 refinement in Coot<sup>43</sup> and Phenix<sup>41</sup>, respectively. The final refinement statistics were validated  
734 using the module ‘comprehensive validation (cryo-EM)’ in PHENIX<sup>44</sup>. Structural figures were  
735 prepared in Chimera, Chimera X<sup>45</sup> and PyMOL (<https://pymol.org/2/46>). The final refinement  
736 statistics are provided in Extended Data Table 1.

**Figure 1****a**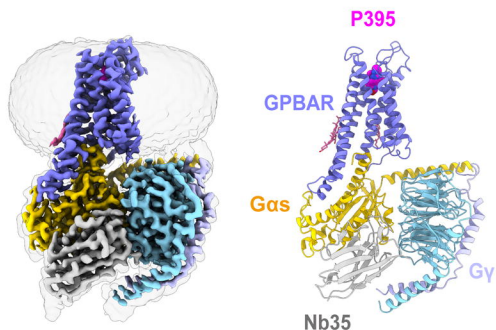**b**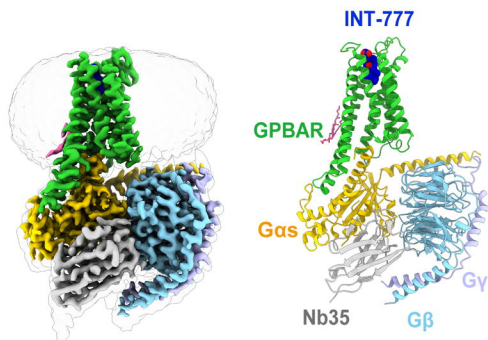**c**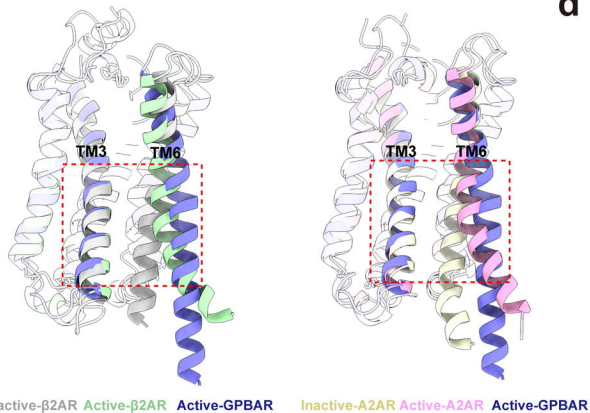**d**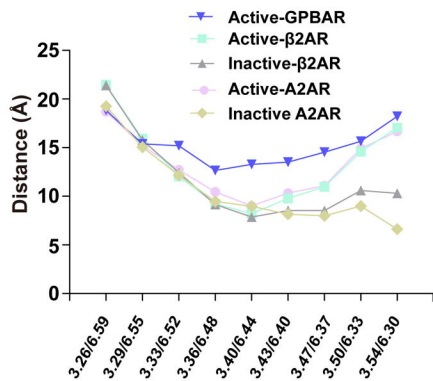**e**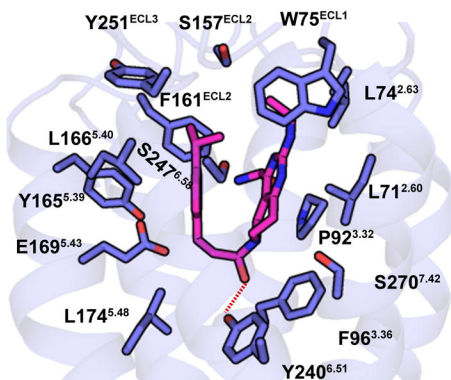**f**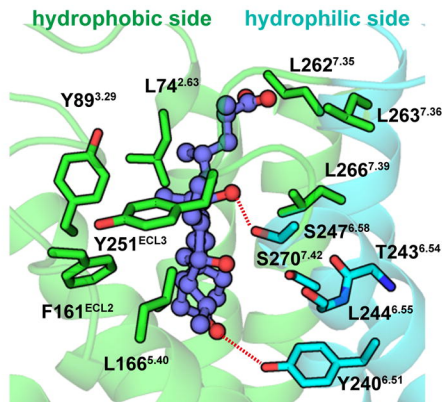

**Figure 2**

**a**

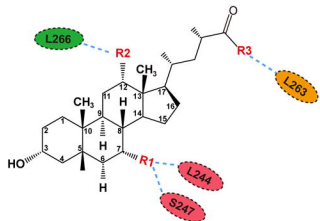

| Name    | R1     | R2     | R3                                                  |
|---------|--------|--------|-----------------------------------------------------|
| INT-777 | (R)-OH | (S)-OH | OH                                                  |
| CA      | (R)-OH | (S)-OH | OH                                                  |
| LCA     | H      | H      | OH                                                  |
| DCA     | H      | (S)-OH | OH                                                  |
| CDCA    | (R)-OH | H      | OH                                                  |
| UDCA    | (S)-OH | H      | OH                                                  |
| GCA     | (R)-OH | (S)-OH | NHCH <sub>2</sub> COOH                              |
| TCA     | (R)-OH | (S)-OH | NH(CH <sub>2</sub> ) <sub>2</sub> SO <sub>3</sub> H |
| TDCA    | H      | (S)-OH | NH(CH <sub>2</sub> ) <sub>2</sub> SO <sub>3</sub> H |
| TUDCA   | (S)-OH | H      | NH(CH <sub>2</sub> ) <sub>2</sub> SO <sub>3</sub> H |

**b**

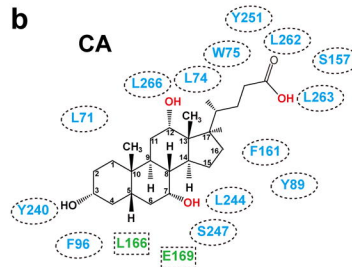

**c**

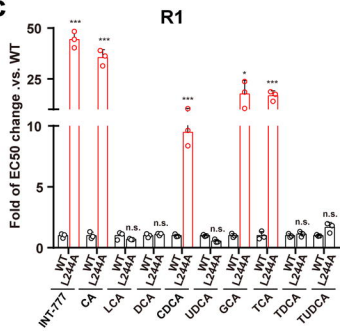

**d**

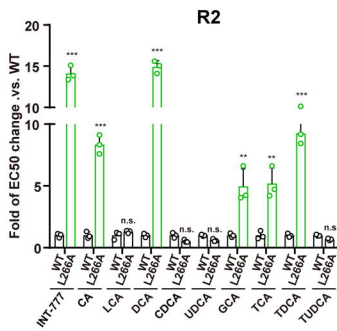

**e**

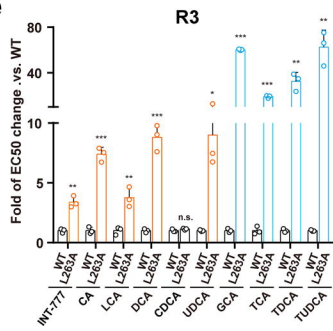

# Figure 3

**a**

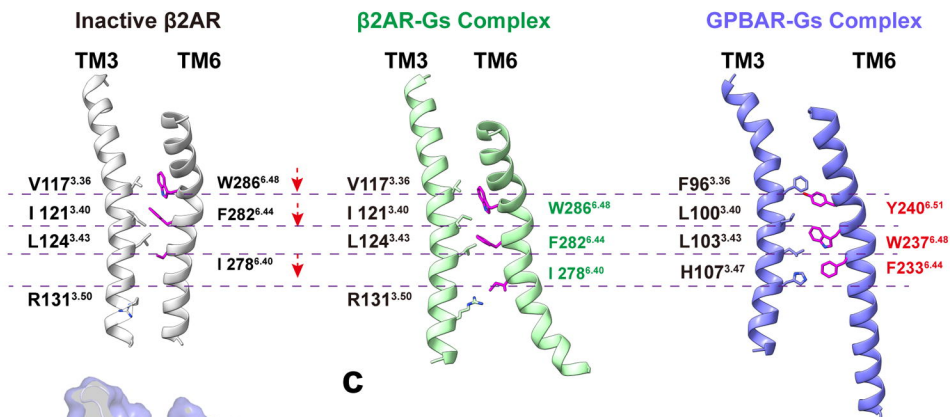

**b**

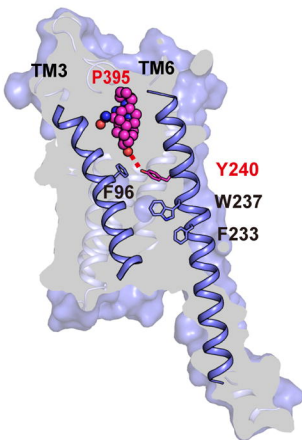

**c**

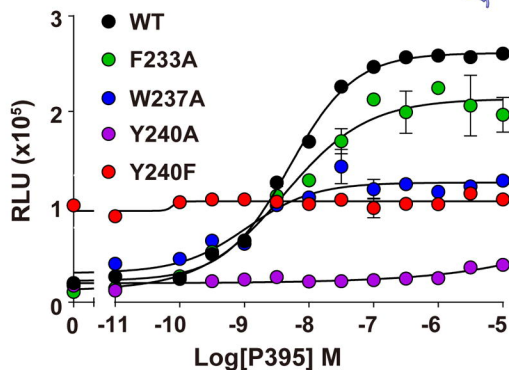

**d**

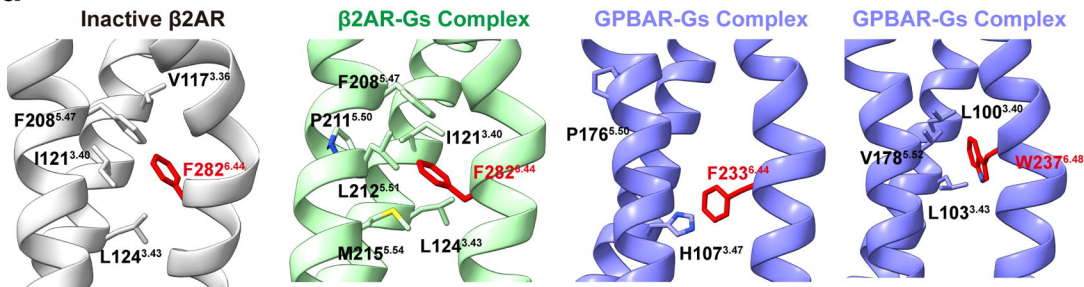

**Figure 4**

**a**

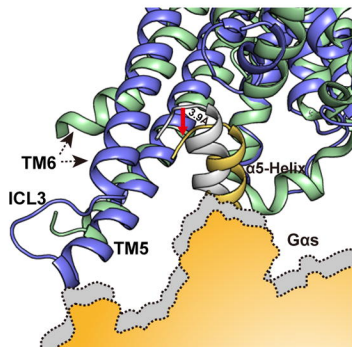

**b**

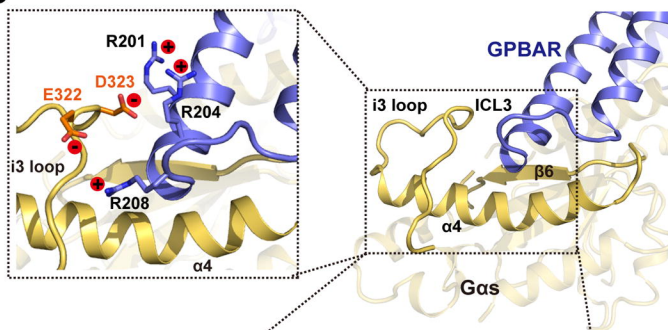

**c**

ICL3 motif **R/K φ X R/K X φ X R**

GPBAR **R L E R A V C R**

V2R **R G G R R R G R**

PF2R **R Q G R S H H L**

EP2 **R G G P G A R R**

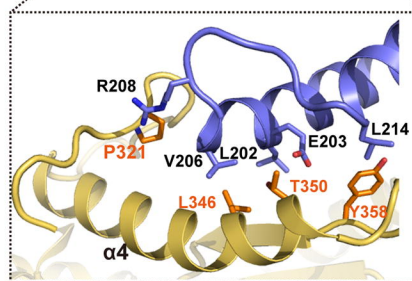

**d**

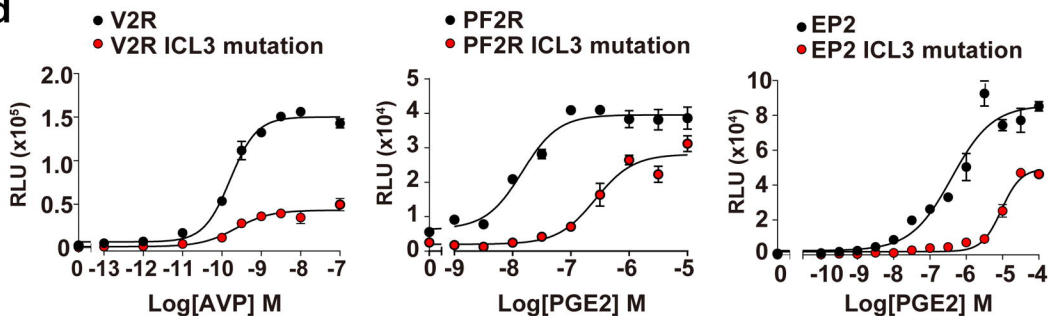

**e**

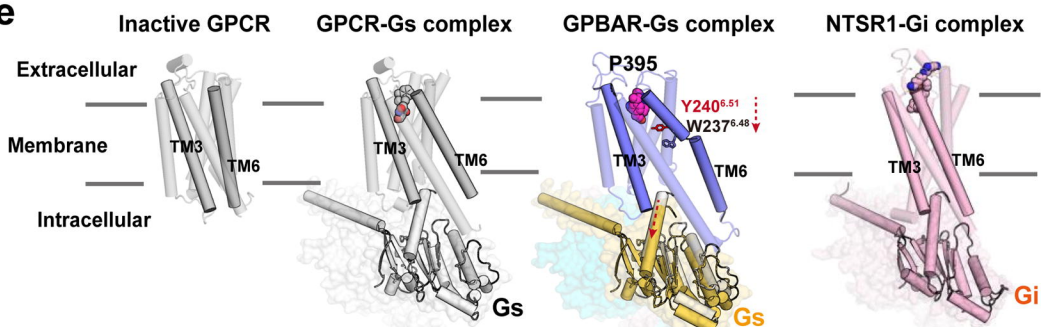



**Figure 5**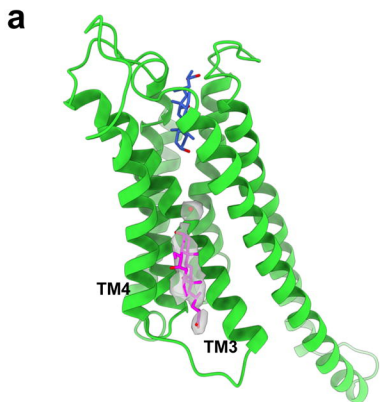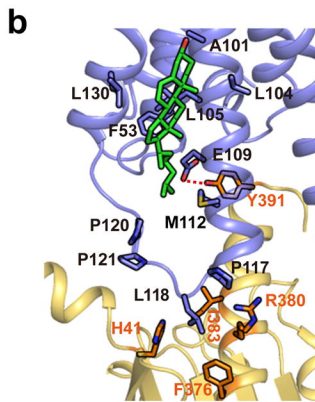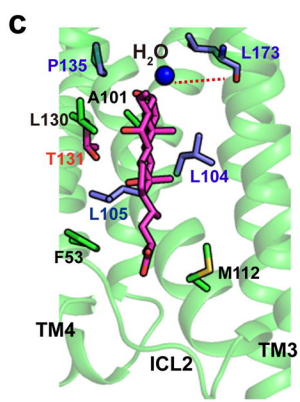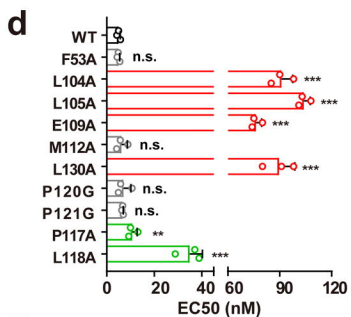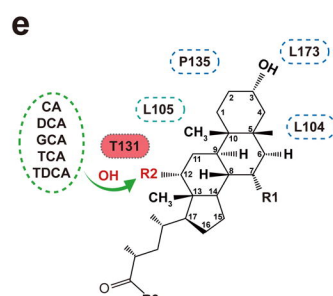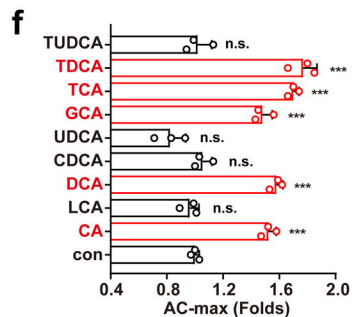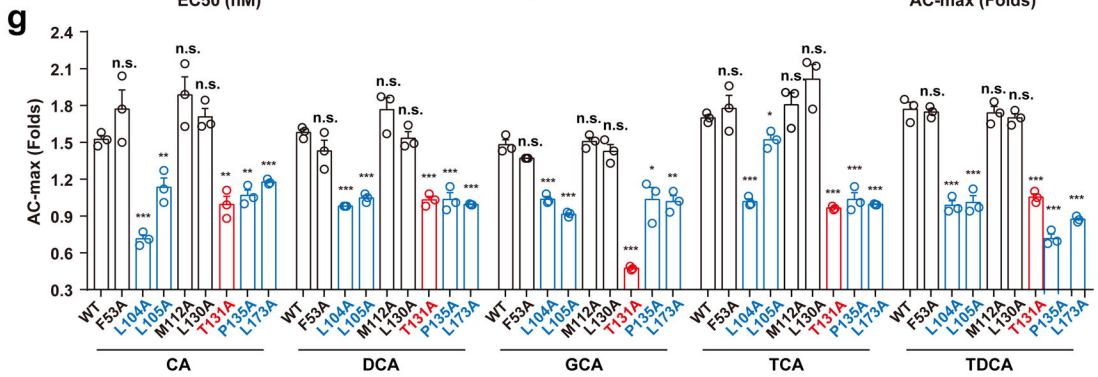

**Figure 6****a**

| Ref           | LCA             |                |
|---------------|-----------------|----------------|
| Ligand        | <i>P395</i>     | <i>INT-777</i> |
| $\beta$ Value | <i>-0.46</i>    | <i>0.57</i>    |
| Bias          | <i>Arrestin</i> | <i>Gs</i>      |

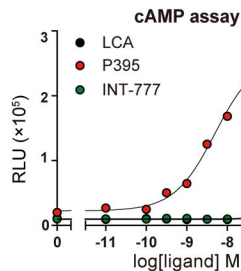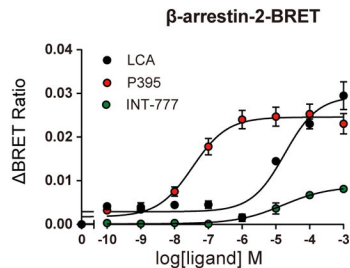**b**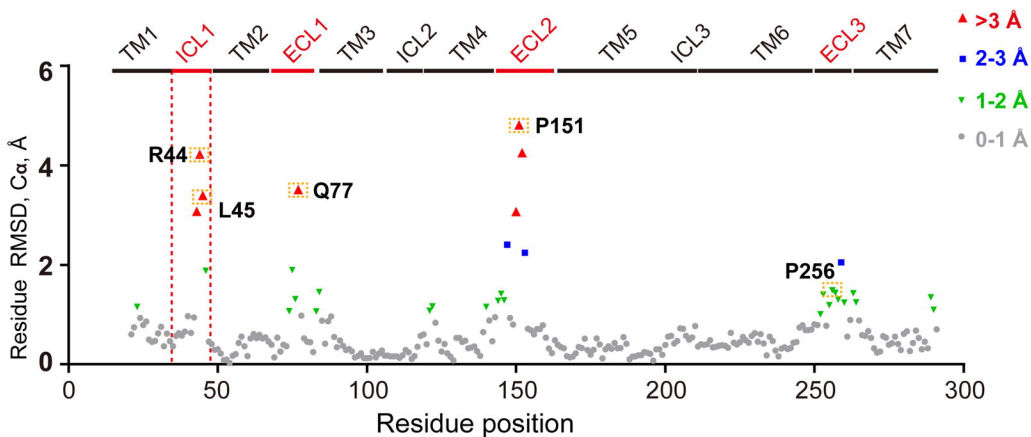**c**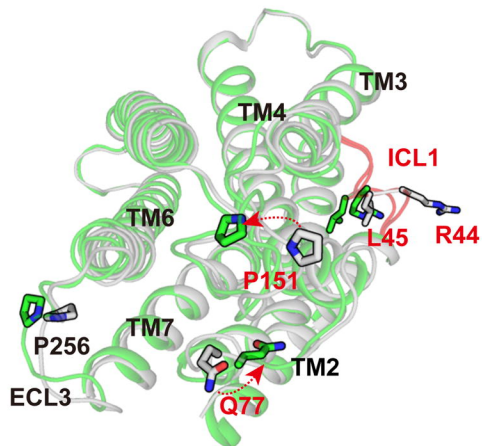**d**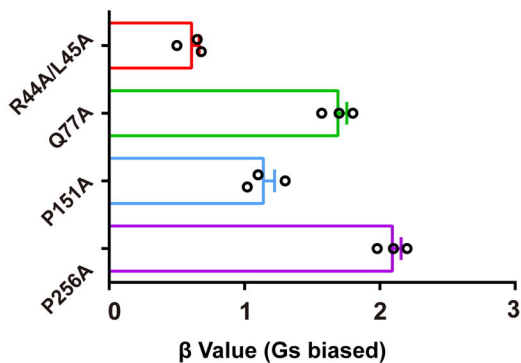

Source: http://biorxiv.org/content/10.1101/2020.05.24.104034v1.full.pdf
